# Supplementary material for: Gre factors-mediated control of hilD transcription is essential for the invasion of epithelial cells by Salmonella enterica serovar Typhimurium
Source: PLOS journal article supplement (doi:10.1371/journal.ppat.1006312), 2017-04-20
Supplement: S4 (10.1371/journal.ppat.1006312.s004) [file journal.ppat.1006312.s004]

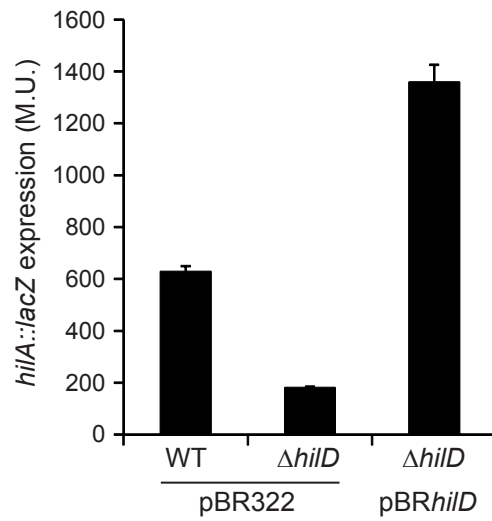

**S4 Figure. The  $\Delta hilD$ -*cm*<sup>R</sup> mutant strain is trans-complemented by a pBR322-based plasmid carrying the *hilD* gene.** Cultures of the strains SV5015UB2 and TGC-10 were grown in LB at 37°C up to an OD<sub>600nm</sub> of 2.0. Data are the average and error bars represent standard deviations from three biological replicates.
